# Supplementary material
Source: publisher figshare collection journal article supplement (https://sage.figshare.com/ndownloader/files/23742594)
Supplement: Supplementary file 1 [file 23742594]

## Supplementary material

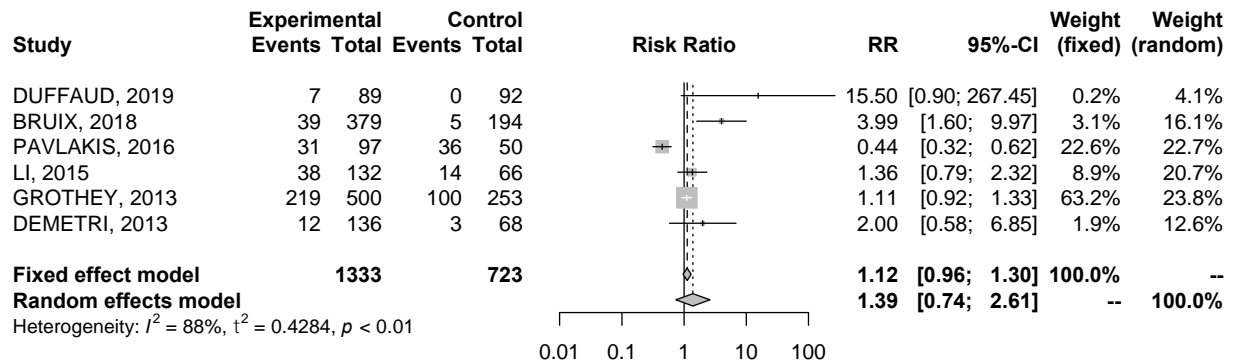

Forest plot of comparison between regorafenib *versus* placebo; the outcome was relative risk of serious adverse events (SAEs). CI: Confidence interval.

### PubMed electronic search strategy:

(Regorafenib[title] OR Stivarga[title] OR BAY 73-4506[title]) AND (phase 2 trial[title]) OR (phase 3 trial[title])
